# Supplementary material for: Bat rabies in Washington State: Temporal-spatial trends and risk factors for zoonotic transmission (2000–2017)
Source: PubMed Central journal article supplement (PMC6177155; doi:10.1371/journal.pone.0205069), 2018-10-09
Supplement: pone.0205069.s002.pdf [file pone.0205069.s002.pdf]

**Table S1. Classification of bats according to synanthropic status. Data from Klug et al (2011)<sup>±</sup> and Hayes et al (2013)<sup>§</sup>.**

| Species                                                                   | Synanthropic     |
|---------------------------------------------------------------------------|------------------|
| Big brown bat ( <i>Eptesicus fuscus</i> )                                 | Yes <sup>±</sup> |
| Silver-haired bat ( <i>Lasionycteris noctivagans</i> )                    | No <sup>±</sup>  |
| California myotis ( <i>Myotis californicus</i> )                          | Yes <sup>±</sup> |
| Western long-eared myotis ( <i>Myotis evotis</i> )                        | No <sup>±</sup>  |
| Yuma myotis ( <i>Myotis yumanensis</i> )                                  | Yes <sup>±</sup> |
| Little brown bat ( <i>Myotis lucifugus</i> )                              | Yes <sup>±</sup> |
| Hoary bat ( <i>Lasiurus cinereus</i> )                                    | No <sup>±</sup>  |
| Northern long-eared myotis ( <i>Myotis septentrionalis</i> ) <sup>¶</sup> | No <sup>±</sup>  |
| Fringed myotis ( <i>Myotis thysanodes</i> )                               | Yes <sup>±</sup> |
| Townsend's big-eared bat ( <i>Corynorhinus townsendii</i> )               | No <sup>±</sup>  |
| Spotted bat ( <i>Euderma maculatum</i> )                                  | No <sup>±</sup>  |
| Southern red bat ( <i>Lasiurus blossevillii</i> ) <sup>¶</sup>            | Unk              |
| Small-footed myotis ( <i>Myotis ciliolabrum</i> )                         | Yes <sup>§</sup> |
| Keen's myotis ( <i>Myotis keenii</i> )                                    | No <sup>±</sup>  |
| Long-legged myotis ( <i>Myotis volans</i> )                               | Yes <sup>±</sup> |
| Big free-tailed bat ( <i>Nyctinomops macrotis</i> ) <sup>¶</sup>          | No <sup>±</sup>  |
| Pallid bat ( <i>Antrozous pallidus</i> )                                  | No <sup>±</sup>  |
| Canyon bat ( <i>Parastrellus hesperus</i> )                               | No <sup>±</sup>  |
