# Supplementary material for: Bat rabies in Washington State: Temporal-spatial trends and risk factors for zoonotic transmission (2000–2017)
Source: PubMed Central journal article supplement (PMC6177155; doi:10.1371/journal.pone.0205069), 2018-10-09
Supplement: pone.0205069.s004.pdf [file pone.0205069.s004.pdf]

**Table S3. Bats with positive RABV test results by cluster, Washington State— 2006–2017. A space-time cluster was defined as  $\geq 4$  RABV positive bats originating from proximal counties during contiguous months.**

| Year | Month     | Date      | Species          | Cluster Size | County    |
|------|-----------|-----------|------------------|--------------|-----------|
| 2008 | June      | 6/4/2008  | <i>E. fuscus</i> | 4            | Pierce    |
|      | July      | 7/9/2008  |                  |              | King      |
|      | July      | 7/18/2008 |                  |              | Thurston  |
|      | August    | 8/5/2008  |                  |              | Snohomish |
| 2009 | July      | 7/14/2009 | <i>E. fuscus</i> | 4            | King      |
|      | August    | 8/4/2009  |                  |              | Pierce    |
|      | September | 9/3/2009  |                  |              | Thurston  |
|      | October   | 10/7/2009 |                  |              | Kittitas  |
| 2014 | August    | 8/15/2014 | <i>M. evotis</i> | 4            | Clallam   |
|      | August    | 8/7/2014  |                  |              | Skagit    |
|      | September | 9/18/2014 |                  |              | Kitsap    |
|      | October   | 10/3/2014 |                  |              | Kitsap    |
| 2015 | June      | 6/22/2015 | <i>E. fuscus</i> | 5            | Thurston  |
|      | July      | 7/27/2015 |                  |              | King      |
|      | August    | 8/5/2015  |                  |              | Mason     |
|      | September | 9/21/2015 |                  |              | King      |
|      | September | 9/25/2015 |                  |              | Snohomish |
| 2016 | July      | 7/22/2016 | <i>E. fuscus</i> | 4            | Mason     |
|      | August    | 8/22/2016 |                  |              | Lewis     |
|      | September | 9/20/2016 |                  |              | Pierce    |
|      | September | 9/30/2016 |                  |              | Thurston  |
| 2017 | May       | 5/16/2017 | <i>E. fuscus</i> | 11           | Snohomish |
|      | June      | 6/6/2017  |                  |              | Pierce    |
|      | July      | 7/26/2017 |                  |              | Snohomish |
|      | July      | 7/21/2017 |                  |              | King      |
|      | August    | 8/31/2017 |                  |              | King      |
|      | August    | 8/30/2017 |                  |              | King      |
|      | August    | 8/24/2017 |                  |              | King      |
|      | August    | 8/18/2017 |                  |              | King      |
|      | August    | 8/29/2017 |                  |              | Lewis     |
|      | August    | 8/25/2017 |                  |              | Pierce    |
|      | September | 9/6/2017  |                  |              | King      |
