# Supplementary material for: Bat rabies in Washington State: Temporal-spatial trends and risk factors for zoonotic transmission (2000–2017)
Source: PubMed Central journal article supplement (PMC6177155; doi:10.1371/journal.pone.0205069), 2018-10-09
Supplement: pone.0205069.s005.pdf [file pone.0205069.s005.pdf]

Bat rabies in Washington State: trends and risk factors for infection (2000–2017)  
Jesse Bonwitt, Hanna Oltean, Misty Lang, Rochelle M. Kelly, Marcia Goldoft

**Table S4. RABV positivity (by fluorescent antibody testing) among passively sampled big brown bats in Southern Canada, 1963–1985.**

| <b>Geographic area</b> | <b>Date</b> | <b>No. bats tested</b> | <b>No. bats positive</b> | <b>% bats positive</b> | <b>Reference</b> |
|------------------------|-------------|------------------------|--------------------------|------------------------|------------------|
| Alberta                | 1973–1978   | 434                    | 34                       | 7.8                    | [4]              |
| British Columbia       | 1963–1967   | 32                     | 7                        | 22.0                   | [5]              |
| British Columbia       | 1977–1985   | 197                    | 33                       | 16.8                   | [6]              |
| Ontario                | 1963–1967   | 220                    | 25                       | 11.4                   | [5]              |
