# Supplementary material for: Bat rabies in Washington State: Temporal-spatial trends and risk factors for zoonotic transmission (2000–2017)
Source: PubMed Central journal article supplement (PMC6177155; doi:10.1371/journal.pone.0205069), 2018-10-09
Supplement: pone.0205069.s008.pdf [file pone.0205069.s008.pdf]

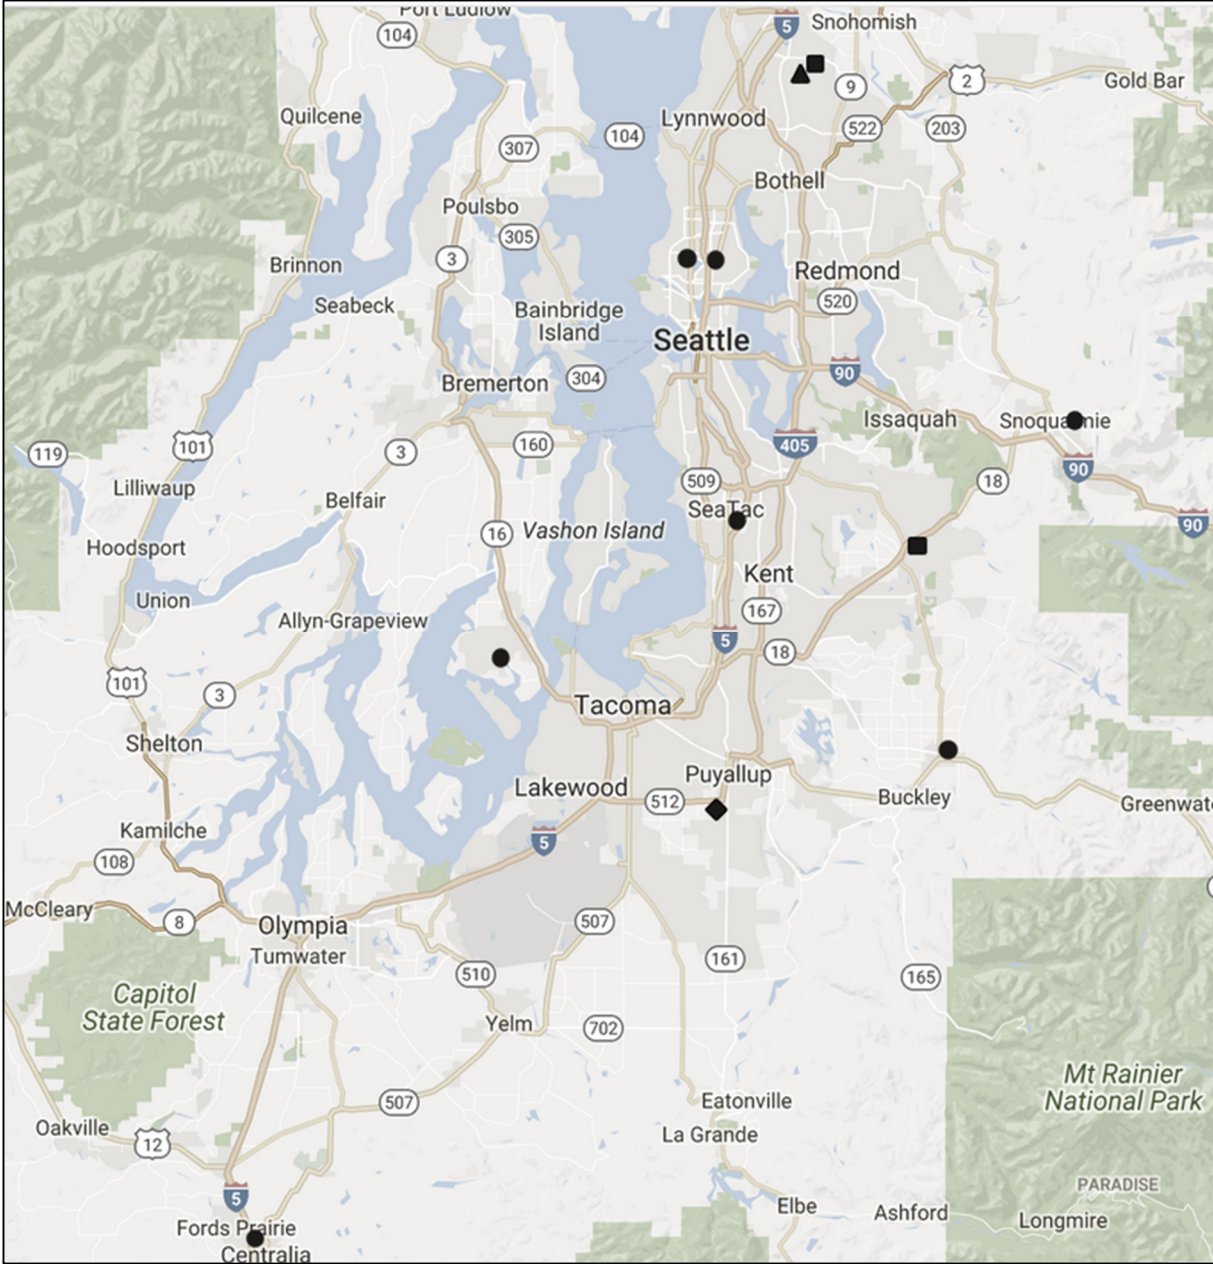

**Figure S3. Cluster of RABV positive big brown bats (*Eptesicus fuscus*) in 2017 (N=11), Western Washington. Shapes denote month of submission; triangle: May; diamond: June; square: July, circle: August.**
