# Supplementary material for: Bat rabies in Washington State: Temporal-spatial trends and risk factors for zoonotic transmission (2000–2017)
Source: PubMed Central journal article supplement (PMC6177155; doi:10.1371/journal.pone.0205069), 2018-10-09
Supplement: pone.0205069.s009.pdf [file pone.0205069.s009.pdf]

Bat rabies in Washington State: trends and risk factors for infection (2000–2017)  
 Jesse Bonwitt, Hanna Oltean, Misty Lang, Rochelle M. Kelly, Marcia Goldoft

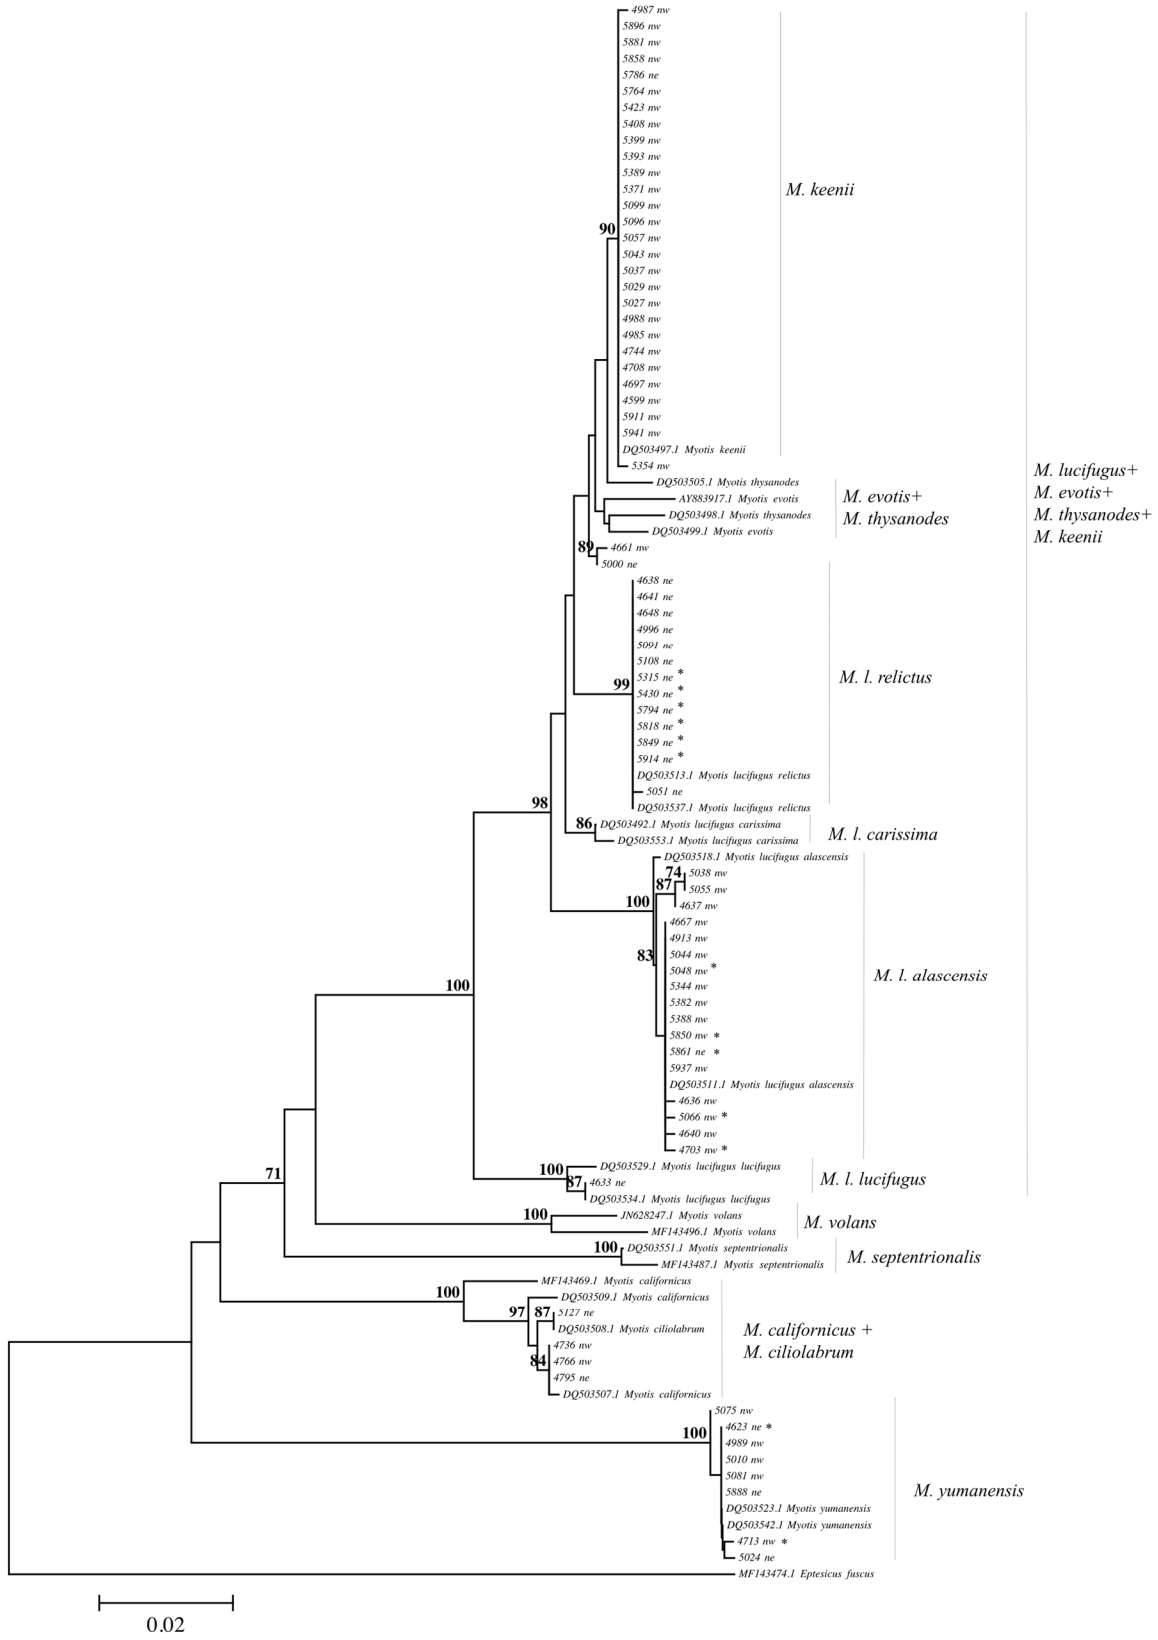

**Figure S4. *Myotis* spp. (n=73) neighbor-joining phylogenetic tree.** A neighbor-joining tree generated for 97 CytB sequences of 629bp in length. The 73 *Myotis* spp. sequences generated in this study were morphologically identified by the Department of Health and are indicated by their sample IDs, whereas the 24 reference sequences are indicated by their GenBank accession numbers and species names. Species assigned to each major clade are indicated, and bootstrap values greater than 70% are indicated. Individuals that clustered in clades outside of their morphological assignment are indicated by (\*).
